# Supplementary material
Source: PubMed Central journal article supplement (PMC1413851)
Supplement: pnas_0511240103_1.pdf [file pnas_0511240103_1.pdf]

**Table 3. Assignment of 875 strains of *Mycobacterium tuberculosis* from 80 countries to six main phylogenetic lineages**

| Country ( <i>N</i> = 80) | Strains from San Francisco | Reference strains | Total strains | Indo-Oceanic lineage | East-Asian lineage | East-African-Indian lineage | Euro-American lineage | West-African lineage 1 | West-African lineage 2 |
|--------------------------|----------------------------|-------------------|---------------|----------------------|--------------------|-----------------------------|-----------------------|------------------------|------------------------|
| <b>Americas</b>          |                            |                   |               |                      |                    |                             |                       |                        |                        |
| USA                      | 77                         |                   | 77            | 4                    | 5                  |                             | 68                    |                        |                        |
| Canada                   | 1                          | 2                 | 3             |                      |                    |                             | 3*                    |                        |                        |
| Mexico                   | 47                         | 3                 | 50            | 2                    | 1                  |                             | 47*                   |                        |                        |
| Guatemala                | 7                          | 5                 | 12            |                      |                    |                             | 12*                   |                        |                        |
| El Salvador              | 14                         |                   | 14            |                      |                    |                             | 14                    |                        |                        |
| Honduras                 | 5                          | 2                 | 7             |                      |                    |                             | 7*                    |                        |                        |
| Nicaragua                | 13                         |                   | 13            |                      |                    |                             | 13                    |                        |                        |
| Cuba                     | 2                          |                   | 2             |                      |                    |                             | 2                     |                        |                        |
| Jamaica                  | 1                          |                   | 1             |                      |                    |                             | 1                     |                        |                        |
| Puerto Rico              | 3                          |                   | 3             |                      |                    |                             | 3                     |                        |                        |
| Colombia                 | 2                          |                   | 2             |                      |                    |                             | 2                     |                        |                        |
| Venezuela                | 1                          |                   | 1             |                      |                    |                             | 1                     |                        |                        |
| Brazil                   | 2                          |                   | 2             |                      |                    |                             | 2                     |                        |                        |
| Ecuador                  | 1                          | 2                 | 3             |                      |                    |                             | 3                     |                        |                        |
| Peru                     | 9                          |                   | 9             |                      | 1                  |                             | 8                     |                        |                        |
| Bolivia                  |                            | 2                 | 2             |                      |                    |                             | 2                     |                        |                        |
| Chile                    | 1                          | 2                 | 3             |                      |                    |                             | 3                     |                        |                        |
| Argentina                | 1                          | 2                 | 3             |                      |                    |                             | 3                     |                        |                        |

| Country ( <i>N</i> = 80)          | Strains from San Francisco | Reference strains | Total strains | Indo-Oceanic lineage | East-Asian lineage | East-African-Indian lineage | Euro-American lineage | West-African lineage 1 | West-African lineage 2 |
|-----------------------------------|----------------------------|-------------------|---------------|----------------------|--------------------|-----------------------------|-----------------------|------------------------|------------------------|
| <b>Europe</b>                     |                            |                   |               |                      |                    |                             |                       |                        |                        |
| Greenland                         |                            | 2                 | 2             |                      |                    |                             | 2*                    |                        |                        |
| Spain                             |                            | 2                 | 2             |                      |                    |                             | 2                     |                        |                        |
| Ireland                           | 1                          | 2                 | 3             |                      |                    |                             | 3                     |                        |                        |
| United Kingdom                    | 1                          |                   | 1             |                      |                    |                             | 1                     |                        |                        |
| Germany                           | 2                          |                   | 2             |                      | 1                  |                             | 1                     |                        |                        |
| Netherlands                       |                            | 2                 | 2             |                      |                    |                             | 2*                    |                        |                        |
| Italy                             | 1                          | 1                 | 2             |                      |                    |                             | 2*                    |                        |                        |
| Austria                           | 1                          |                   | 1             |                      |                    |                             | 1                     |                        |                        |
| Czech Republic                    |                            | 2                 | 2             |                      |                    |                             | 2                     |                        |                        |
| Albania                           | 1                          |                   | 1             |                      |                    |                             | 1                     |                        |                        |
| Bosnia/Herzegovina                | 2                          |                   | 2             |                      |                    |                             | 2                     |                        |                        |
| Poland                            | 1                          |                   | 1             |                      |                    |                             | 1                     |                        |                        |
| Ukraine                           | 1                          |                   | 1             |                      |                    |                             | 1                     |                        |                        |
| Russia                            | 10                         | 3                 | 13            | 1                    | 3*                 |                             | 9                     |                        |                        |
| <b>North Africa / Middle East</b> |                            |                   |               |                      |                    |                             |                       |                        |                        |
| Algeria                           | 1                          | 1                 | 2             |                      |                    |                             | 2*                    |                        |                        |
| Morocco                           | 1                          |                   | 1             |                      |                    |                             | 1                     |                        |                        |
| Tunisia                           |                            | 2                 | 2             |                      |                    |                             | 2*                    |                        |                        |
| Iran                              | 1                          | 2                 | 3             |                      |                    |                             | 3*                    |                        |                        |



| Country ( <i>N</i> = 80)   | Strains from San Francisco | Reference strains | Total strains | Indo-Oceanic lineage | East-Asian lineage | East-African-Indian lineage | Euro-American lineage | West-African lineage 1 | West-African lineage 2 |
|----------------------------|----------------------------|-------------------|---------------|----------------------|--------------------|-----------------------------|-----------------------|------------------------|------------------------|
| Ethiopia                   | 10                         |                   | 10            |                      |                    | 4                           | 6                     |                        |                        |
| Somalia                    | 1                          | 3                 | 4             |                      |                    | 3*                          | 1                     |                        |                        |
| Kenya                      | 1                          |                   | 1             |                      |                    |                             | 1                     |                        |                        |
| Tanzania                   |                            | 2                 | 2             | 1*                   |                    | 1*                          |                       |                        |                        |
| Zimbabwe                   |                            | 2                 | 2             | 1*                   |                    |                             | 1*                    |                        |                        |
| Comoro Islands             |                            | 1                 | 1             | 1*                   |                    |                             |                       |                        |                        |
| <b>Indian Subcontinent</b> |                            |                   |               |                      |                    |                             |                       |                        |                        |
| India                      | 9                          | 3                 | 12            | 3*                   | 1                  | 7*                          | 1                     |                        |                        |
| Pakistan                   | 2                          |                   | 2             |                      |                    | 2                           |                       |                        |                        |
| Bangladesh                 | 1                          |                   | 1             |                      |                    | 1                           |                       |                        |                        |
| Sri Lanka                  |                            | 2                 | 2             |                      |                    |                             | 2*                    |                        |                        |
| <b>Southeast Asia</b>      |                            |                   |               |                      |                    |                             |                       |                        |                        |
| The Philippines            | 141                        |                   | 141           | 131                  | 8                  |                             | 2                     |                        |                        |
| Vietnam                    | 95                         |                   | 95            | 29                   | 47                 |                             | 19                    |                        |                        |
| Myanmar                    | 9                          |                   | 9             | 4                    | 3                  | 1                           | 1                     |                        |                        |
| Cambodia                   | 5                          |                   | 5             | 2                    | 1                  |                             | 2                     |                        |                        |
| Laos                       | 3                          |                   | 3             |                      | 3                  |                             |                       |                        |                        |
| Thailand                   | 1                          | 2                 | 3             | 1                    | 2*                 |                             |                       |                        |                        |
| Malaysia                   |                            | 2                 | 2             |                      | 2*                 |                             |                       |                        |                        |
| Singapore                  | 2                          |                   | 2             |                      | 2                  |                             |                       |                        |                        |

| <b>Country (N = 80)</b> | <b>Strains from San Francisco</b> | <b>Reference strains</b> | <b>Total strains</b> | <b>Indo-Oceanic lineage</b> | <b>East-Asian lineage</b> | <b>East-African-Indian lineage</b> | <b>Euro-American lineage</b> | <b>West-African lineage 1</b> | <b>West-African lineage 2</b> |
|-------------------------|-----------------------------------|--------------------------|----------------------|-----------------------------|---------------------------|------------------------------------|------------------------------|-------------------------------|-------------------------------|
| Indonesia               | 12                                |                          | 12                   | 2                           | 5                         |                                    | 5                            |                               |                               |
| <b>East Asia</b>        |                                   |                          |                      |                             |                           |                                    |                              |                               |                               |
| China                   | 227                               |                          | 227                  | 17                          | 163                       |                                    | 47                           |                               |                               |
| Hong Kong               | 15                                |                          | 15                   |                             | 11                        |                                    | 4                            |                               |                               |
| Taiwan                  | 1                                 |                          | 1                    |                             |                           |                                    | 1                            |                               |                               |
| Macau                   | 1                                 |                          | 1                    |                             | 1                         |                                    |                              |                               |                               |
| South Korea             | 12                                | 1                        | 13                   |                             | 11*                       |                                    | 2                            |                               |                               |
| Japan                   | 2                                 |                          | 2                    |                             | 2                         |                                    |                              |                               |                               |
| Mongolia                | 1                                 | 2                        | 3                    |                             | 2*                        |                                    | 1*                           |                               |                               |
| <b>Pacific Islands</b>  |                                   |                          |                      |                             |                           |                                    |                              |                               |                               |
| Samoa                   | 2                                 |                          | 2                    |                             |                           |                                    | 2                            |                               |                               |
| Tahiti                  |                                   | 2                        | 2                    |                             |                           |                                    | 2*                           |                               |                               |
| <b>Total</b>            | <b>767</b>                        | <b>108</b>               | <b>875</b>           | <b>199</b>                  | <b>277</b>                | <b>20</b>                          | <b>363</b>                   | <b>9</b>                      | <b>7</b>                      |

\*, includes reference strains.
