# Supplementary material
Source: PubMed Central journal article supplement (PMC1413851)
Supplement: pnas_0511240103_2.pdf [file pnas_0511240103_2.pdf]

**Table 4. Characteristics of the 20 lineage-defining large sequence polymorphisms (LSPs) found in *M. tuberculosis***

| RD  | Start   | Stop    | Size, bp | Affected ORF(s)     | Forward (F) and reverse (R) PCR Primers (5'-3')                    | AT | Expected PCR product size, bp |         | Comment | Ref. |
|-----|---------|---------|----------|---------------------|--------------------------------------------------------------------|----|-------------------------------|---------|---------|------|
|     |         |         |          |                     |                                                                    |    | H37Rv                         | deleted |         |      |
|     |         |         |          |                     |                                                                    |    | H37Rv                         | deleted |         | 1    |
| 105 | 79567   | 83034   | 3,467    | Rv0071-<br>Rv0074   | F: GGAGTCGTTGAGGGTGTTCATCAGCTCAGTC<br>R: CGCCAAGGCCGCATAGTCACGGTCG | 64 | 4252                          | 785     |         | 1    |
| 115 | 453364  | 455971  | 2,607    | Rv0376c-<br>Rv0378  | F: TTCGGGGGCCAGGTCGTTGAT<br>R: CCGCGGGAATGCCTGCTGTTAT              | 64 | 3442                          | 835     |         | 1    |
| 122 | 669793  | 670964  | 1,171    | Rv0576              | F: GCCGGCACCGCTAATCGCTACTT<br>R: TTCTCTTGGGCATGATCATCCTTTTCGTTA    | 64 | 1456                          | 285     |         | 1    |
| 142 | 1332182 | 1335033 | 2,851    | Rv1189-<br>Rv1192   | F: TCCGCGACGACGAACAACGAC<br>R: TCACTTCCATTTCCAGCGGCAACT            | 64 | 3634                          | 783     |         | 1    |
| 150 | 1896862 | 1899349 | 2,487    | Rv1671-<br>Rv1674c  | F: TGTGGCGTGGCTCGGCAAATAG<br>R: CGGGACGGCAAACGGGTGAT               | 64 | 3266                          | 779     |         | 1    |
| 174 | 2237049 | 2240699 | 3,650    | Rv1992c-<br>Rv1997  | F: GGTGCCCTCCCGCAGAACTGTG<br>R: AGCGCGATCGCAGCGGTGAA               | 64 | 4524                          | 874     |         | 1    |
| 181 | 2535429 | 2536140 | 711      | Rv2262c-<br>Rv2263  | F: CGCAACGGCCGCGGTGAACTCT<br>R: CGGGCGGCTGCGGGAACCTT               | 62 | 1712                          | 1001    |         | 1    |
| 182 | 2545194 | 2551674 | 6,480    | Rv2270-<br>Rv2280   | F: TGTTATACGCCCTGTCGGCGGTCACCAT<br>R: GCGCATCCCGCCGGCGTTGGTT       | 64 | 7292                          | 812     |         | 1    |
| 183 | 2585853 | 2588770 | 2,917    | Rv2313c-<br>Rv2315c | F: CCGAACC GCCCGCATCAAG<br>R: ACGACGGCCGAAACCACAGGAA               | 64 | 3965                          | 1048    |         | 1    |
| 193 | 2704306 | 2704807 | 501      | Rv2406c-            | F: CCGACTACGCCTGGCGCTAAACC                                         | 64 | 1308                          | 807     |         | 1    |

| RD  | Start   | Stop    | Size, bp | Affected ORF(s)     | Forward (F) and reverse (R) PCR Primers (5'-3')            | AT | Expected PCR product size, bp |        | Comment                                     | Ref.          |
|-----|---------|---------|----------|---------------------|------------------------------------------------------------|----|-------------------------------|--------|---------------------------------------------|---------------|
|     |         |         |          | Rv2407              | R: GTAGGGGCCACCCGGATTGTCAC                                 |    |                               |        |                                             |               |
| 207 | 3120521 | 3127920 | 7,399    | Rv2814c-<br>Rv2820c | F: GACGAGTTCGCGCTCAAAATGT<br>R: CCCCGGCGAGGAACAGAA         | 64 | 8,577                         | 1,178  |                                             | 1             |
| 219 | 3448504 | 3451396 | 2,892    | Rv3083-<br>Rv3085   | F: GCGTCGGTGCCAGTTGC<br>R: GCGACGGCGGTTTTGATGC             | 64 | 3,609                         | 717    |                                             | 1             |
| 239 | 4092077 | 4092919 | 842      | Rv3651              | F: GGCCAACATCGACCACCTACCC<br>R: ATCCTCGCTACCGGCACCTCAT     | 64 | 1,730                         | 888    |                                             | 1             |
| 702 | 216795  | 218516  | 1,722    | Rv0186              | F: TTCCGAGGACCCGTTGTTGAGTGC<br>R: GGGCGGGTTGGGTTGCTGGTC    | 64 | 2,088                         | 718    | 217874-<br>217522<br>rearranged<br>sequence | 2             |
| 711 | 1501713 | 1503655 | 1,943    | Rv1333-<br>Rv1336   | F: GGCCGCCCTGCTCAAGAACCT<br>R: CCTAGGCCGGCGACGAAGTG        | 64 | 2,884                         | 941    |                                             | 2             |
| 724 | 2265112 | 2266239 | 1,128    | Rv2018-<br>Rv2019   | F: CCATGCGATTTGACTTCCGATTGA<br>R: ATATACCGTGCCGCGACTTGCTCT | 64 | 1,288                         | ≈1,650 | insertion<br>of IS6110                      | 2             |
| 726 | 3904958 | 3906706 | 1,749    | Rv3485c-<br>Rv3487c | F: GCCCGGGCGGATGCTGTT<br>R: CGGCGGCGGTTTTGTCA              | 64 | 2,062                         | 313    |                                             | This<br>study |
| 750 | 1710767 | 1711556 | 790      | Rv1519-<br>Rv1520   | F: GTCGGCGGTCTGCTTCGTTCC<br>R: CCTGTGCGCCGGGTGTCTTTC       | 64 | 1,533                         | 743    |                                             | This<br>study |
| 761 | 1502787 | 1503881 | 1,094    | Rv1334-<br>Rv1336   | F: GCCGGCGTGCTCAATGCTCAG<br>R: CCTAGGCCGGCGACGAAGTGC       | 60 | 1,389                         | 295    |                                             | This<br>study |

| RD                         | Start | Stop | Size, bp | Affected ORF(s)     | Forward (F) and reverse (R) PCR Primers (5'-3')            | AT | Expected PCR product size, bp |     | Comment | Ref. |
|----------------------------|-------|------|----------|---------------------|------------------------------------------------------------|----|-------------------------------|-----|---------|------|
| <i>pks15/1</i><br>7bp del. | na    | na   | 7        | Rv2946c-<br>Rv2947c | F: CTGGGTTGGCCTGCACGTGGGCCATAA<br>R: GCCCCCGCAGAGGCGCCGGTT | 62 | 143                           | 143 |         | 3    |

RD, region of difference; AT, annealing temperature; na, not applicable.

1. Tsolaki, A. G., Hirsh, A. E., DeRiemer, K., Enciso, J. A., Wong, M. Z., Hannan, M., Goguet de la Salmoniere, Y. O., Aman, K., Kato-Maeda, M. & Small, P. M. (2004) *Proc. Natl. Acad. Sci. USA* **101**, 4865-4870.

2. Mostowy, S., Onipede, A., Gagneux, S., Niemann, S., Kremer, K., Desmond, E. P., Kato-Maeda, M. & Behr, M. (2004) *J. Clin. Microbiol.* **42**, 3594-3599.

3. Marmiesse, M., Brodin, P., Buchrieser, C., Gutierrez, C., Simoes, N., Vincent, V., Glaser, P., Cole, S. T. & Brosch, R. (2004) *Microbiology* **150**, 483-496.
