# Supplementary material
Source: PubMed Central journal article supplement (PMC1413851)
Supplement: pnas_0511240103_3.pdf [file pnas_0511240103_3.pdf]

**Table 5. Primer and probe sequences used in the TaqMan multiplex real-time PCR assays**

| <b>Assay</b>       | <b>Forward (F) and reverse (R) Primers (5'-3')</b>                                                                           | <b>TaqMan probes (5'-3')</b>                                                        |
|--------------------|------------------------------------------------------------------------------------------------------------------------------|-------------------------------------------------------------------------------------|
| <i>katG463_SNP</i> | F: CCGAGATTGCCAGCCTTAAG<br>R: GAAACTAGCTGTGAGACAGTCAATCC                                                                     | <i>katG463_cgg</i> : FAM-CAGATCCGGGCATC<br><i>katG463_ctg</i> : VIC-CCAGATCCTGGCATC |
| RD105/RD239        | RD105-F: AACGAACTGCGCACTGAACTC<br>RD105-R: TCCCGCACCGGTTGAG<br>RD239-F: CGAGCTCAATCCGAACGAAA<br>RD239-R: CCGGGCTTGGCTTTAACTG | RD105: FAM-AGAGTGGACAGTTTCG<br>RD239: VIC-CCAGGTGCTTGCCATG                          |
| TbD1/RD9           | TbD1-F: CCGATTGACCACAGCTCGAT<br>TbD1-R: CTGGCCGACGCTTTGC<br>RD9-F: TGGTGGCGGTAGGTTTCAC<br>RD9-R: ATGACCCGCGCGATGT            | TbD1: FAM-CCGTTTCAGATCAGC<br>RD9: VIC-TTCGACCCCAAGACT                               |
