# Supplementary material
Source: PubMed Central journal article supplement (PMC1413851)
Supplement: pnas_0511240103_4.pdf [file pnas_0511240103_4.pdf]

| <b>Region<br/>(country)</b> | <b>Total</b> | <b>RD115</b> | <b>RD122</b> | <b>RD174</b> | <b>RD182</b> | <b>RD183</b> | <b>RD193</b> | <b>RD219</b> | <b>RD724</b> | <b>RD726</b> | <b>RD761</b> | <b>H37Rv-like</b> |
|-----------------------------|--------------|--------------|--------------|--------------|--------------|--------------|--------------|--------------|--------------|--------------|--------------|-------------------|
| Sri Lanka                   | 2            |              |              |              | 2            |              |              |              |              |              |              |                   |
| <b>East Asia</b>            |              |              |              |              |              |              |              |              |              |              |              |                   |
| China                       | 2            |              | 2            |              |              |              |              |              |              |              |              |                   |
| Mongolia                    | 1            |              |              |              | 1            |              |              |              |              |              |              |                   |
| <b>Pacific Islands</b>      |              |              |              |              |              |              |              |              |              |              |              |                   |
| Tahiti                      | 1            | 1            |              |              |              |              |              |              |              |              |              |                   |
| <b>Total</b>                | <b>128</b>   | 18           | 4            | 17           | 29           | 10           | 4            | 13           | 9            | 11           | 1            | 12                |
