# Supplementary material
Source: PubMed Central journal article supplement (PMC1413851)
Supplement: pnas_0511240103_5.pdf [file pnas_0511240103_5.pdf]

**Table 7. No. of secondary cases caused by three *M. tuberculosis* lineages in five different patient populations in San Francisco (1991–2001)**

| Patient population<br>(born in) | <i>M. tuberculosis</i><br>lineage | Secondary cases |        |       |            |              |                |
|---------------------------------|-----------------------------------|-----------------|--------|-------|------------|--------------|----------------|
|                                 |                                   | <i>n</i>        | (%)    | Rate  | Rate ratio | (95% C.I.)   | <i>P</i> value |
| Total<br>San Francisco          | East-Asian                        | 89              | (14.7) | 0.17  | 0.32       | (0.25–0.40)  | <0.0001        |
|                                 | Indo-Oceanic                      | 124             | (20.5) | 0.3   | 0.71       | (0.58–0.86)  | <0.001         |
|                                 | Euro-American                     | 381             | (63.1) | 0.68  | 3.0        | (2.5–3.6)    | <0.0001        |
|                                 | Total                             | 604             | (100)  |       |            |              |                |
| United States                   | East-Asian                        | 43              | (11.8) | 0.08  | 0.25       | (0.18–0.35)  | <0.0001        |
|                                 | Indo-Oceanic                      | 10              | (2.8)  | 0.02  | 0.08       | (0.04–0.14)  | <0.0001        |
|                                 | Euro-American                     | 302             | (83.2) | 0.54  | 9.5        | (7.1–13.0)   | <0.0001        |
|                                 | Total                             | 363             | (100)  |       |            |              |                |
| China                           | East-Asian                        | 31              | (67.4) | 0.06  | 3.8        | (2.0–7.5)    | <0.0001        |
|                                 | Indo-Oceanic                      | 8               | (17.4) | 0.02  | 0.56       | (0.23–1.2)   | 0.13           |
|                                 | Euro-American                     | 7               | (15.2) | 0.01  | 0.3        | (0.11–0.68)  | <0.01          |
|                                 | Total                             | 46              | (100)  |       |            |              |                |
| The Philippines                 | East-Asian                        | 2               | (2.6)  | 0.004 | 0.05       | (0.006–0.18) | <0.0001        |
|                                 | Indo-Oceanic                      | 67              | (88.2) | 0.16  | 19.9       | (9.9–45.5)   | <0.0001        |
|                                 | Euro-American                     | 7               | (9.2)  | 0.01  | 0.17       | (0.07–0.37)  | <0.0001        |
|                                 | Total                             | 76              | (100)  |       |            |              |                |
| Central America                 | East-Asian                        | 2               | (5.6)  | 0.004 | 0.11       | (0.01–0.42)  | <0.0001        |
|                                 | Indo-Oceanic                      | 2               | (5.6)  | 0.005 | 0.16       | (0.02–0.61)  | <0.01          |
|                                 | Euro-American                     | 32              | (88.9) | 0.06  | 13.4       | (4.7–52.1)   | <0.0001        |
|                                 | Total                             | 36              | (100)  |       |            |              |                |
| Vietnam                         | East-Asian                        | 3               | (9.7)  | 0.006 | 0.2        | (0.04–0.63)  | <0.01          |
|                                 | Indo-Oceanic                      | 26              | (83.9) | 0.06  | 13.9       | (5.3–46.5)   | <0.0001        |
|                                 | Euro-American                     | 2               | (6.5)  | 0.004 | 0.12       | (0.01–0.46)  | <0.001         |
|                                 | Total                             | 31              | (100)  |       |            |              |                |

**C.I., confidence interval.**
