# Supplementary material
Source: PubMed Central journal article supplement (PMC1413851)
Supplement: pnas_0511240103_6.pdf [file pnas_0511240103_6.pdf]

**Table 8. Results of the univariate analysis in 490 U.S.-born patients from San Francisco (1991–2001): Host factors associated with three *M. tuberculosis* lineages**

| Risk factor                          | East-Asian lineage ( <i>N</i> = 55) |        | Indo-Oceanic lineage ( <i>N</i> = 23) |        | Euro-American lineage ( <i>N</i> = 412) |        | <i>P</i> value 3×2* | <i>P</i> values 2×2† |
|--------------------------------------|-------------------------------------|--------|---------------------------------------|--------|-----------------------------------------|--------|---------------------|----------------------|
|                                      | <i>N</i>                            | (%)    | <i>N</i>                              | (%)    | <i>N</i>                                | (%)    |                     |                      |
| Male                                 | 41                                  | (74.6) | 21                                    | (91.3) | 336                                     | (81.6) | 0.205               |                      |
| Age at diagnosis, median (range), yr | 43                                  | (2–88) | 46                                    | (2–75) | 41                                      | (1–89) | 0.363‡              |                      |
| <b>Age groups:</b>                   |                                     |        |                                       |        |                                         |        |                     |                      |
| ≤ 24 yr                              | 3                                   | (5.5)  | 1                                     | (4.4)  | 16                                      | (3.9)  | 0.856               |                      |
| 25–44 yr                             | 28                                  | (50.9) | 9                                     | (39.1) | 250                                     | (60.7) | 0.059               | 0.206; 0.049; 0.059  |
| ≥ 45 yr                              | 24                                  | (43.6) | 13                                    | (56.5) | 146                                     | (35.4) | 0.075               | 0.289; 0.049; 0.081  |
| <b>Ethnicity:</b>                    |                                     |        |                                       |        |                                         |        |                     |                      |
| Black                                | 21                                  | (38.2) | 8                                     | (34.8) | 180                                     | (43.7) | 0.545               |                      |
| White                                | 22                                  | (40.0) | 10                                    | (43.5) | 177                                     | (43.0) | 0.914               |                      |
| Hispanic                             | 1                                   | (1.8)  | 2                                     | (8.7)  | 32                                      | (7.8)  | 0.262               |                      |
| Chinese                              | 6                                   | (10.9) | 0                                     | (0.0)  | 6                                       | (1.5)  | <0.001              | <0.001; 1.0§; 0.001  |
| Filipino                             | 0                                   | (0.0)  | 2                                     | (8.7)  | 3                                       | (0.7)  | 0.001               | 1.0§; 0.019§; 0.191§ |
| HIV-positive                         | 21                                  | (38.2) | 14                                    | (60.9) | 176                                     | (42.7) | 0.171               | 0.425; 0.080; 0.623  |
| Homelessness                         | 26/42¶                              | (61.9) | 5/20¶                                 | (25.0) | 134/296¶                                | (45.3) | 0.019               | 0.027; 0.065§; 0.569 |
| Intravenous drug use                 | 13/42¶                              | (31.0) | 3/20¶                                 | (15.0) | 62/276¶                                 | (22.5) | 0.323               |                      |

| Risk factor                   | East-Asian lineage (N = 55) |        | Indo-Oceanic lineage (N = 23) |        | Euro-American lineage (N = 412) |        | P value 3×2* | P values 2×2 <sup>†</sup> |
|-------------------------------|-----------------------------|--------|-------------------------------|--------|---------------------------------|--------|--------------|---------------------------|
|                               | N                           | (%)    | N                             | (%)    | N                               | (%)    |              |                           |
| Non-intravenous drug use      | 19/41 <sup>¶</sup>          | (46.3) | 5/20 <sup>¶</sup>             | (25.0) | 104/275 <sup>¶</sup>            | (37.8) | 0.266        |                           |
| Alcohol abuse                 | 17/42 <sup>¶</sup>          | (40.5) | 6/20 <sup>¶</sup>             | (30.0) | 101/280 <sup>¶</sup>            | (36.1) | 0.717        |                           |
| Sputum smear positive         | 26/46 <sup>¶</sup>          | (56.5) | 12/19 <sup>¶</sup>            | (63.2) | 168/362 <sup>¶</sup>            | (46.4) | 0.179        | 0.229; 0.180; 0.097       |
| Cavities on chest radiography | 7                           | (12.7) | 2                             | (8.7)  | 47                              | (11.4) | 0.877        |                           |
| Extra-pulmonary tuberculosis  | 6                           | (10.9) | 3                             | (13.0) | 45                              | (10.9) | 0.951        |                           |

\* $\chi^2$  with two degrees of freedom.

<sup>†</sup>  $\chi^2$  pair-wise comparisons; P values are listed in the following order: East-Asian lineage versus all other lineages, Southeast-Asian lineage versus all other lineages, Euro-American lineage versus all other lineages.

<sup>‡</sup> Kruskal-Wallis test with two degrees of freedom.

<sup>§</sup> Fisher's two-tailed exact test.

<sup>¶</sup> Denominator is less due to missing values.
